# Supplementary material
Source: publisher site journal article supplement (https://www.dovepress.com/article/317908)
Supplement: Supplementary file 1 [file get_supplementary_file.php]

## **Designed questionnaire used in the study**

### **1. Gender**

- A. Male
- B. Female

### **2. Age group**

- A. 18-27 years
- B. 28-37 years
- C. 38-47 years
- D. Above 47

### **3. Marital status**

- A. Single
- B. Married
- A. Divorced

### **4. Monthly income**

- A. Less than 3000 SR
- B. 3000-5999 SR
- C. 6000-10999 SR
- D. 11000-15999 SR
- E. 16000-20000 SR
- F. Above 20000 SR

### **5. Healthcare profession**

- A. General physician (GP)
- B. Specialist
- C. Technician
- D. Nurse
- E. Pharmacist
- F. Other

### **6. Which of the following geographical regions are you from:**

- A. West
- B. Middle
- C. East
- D. North
- E. South

### **7. What is the main source of your information regarding COVID-19 pandemic**

- A. Ministry of health
- B. Friends or relatives
- C. Social media
- D. World health organisation (WHO)
- E. Television (TV)
- F. Other

### **8. Who do you think should stay at home during the pandemic of COVID-19?**

- A. Elderly people only
- B. Individuals with symptomatic respiratory infections
- C. Children
- D. All the population
- E. Do not know

**9. Do you think that people can be infected with SARS-CoV2 without symptoms?**

- A. Yes
- B. No
- C. Do not know

**10. Which of the following can be defined as an effective way to prevent infection with SARS-CoV2?**

- A. Washing hands
- B. Taking vitamins to boost immunity
- C. Using a mouthwash
- D. Influenza vaccine
- E. Avoiding contact with those with chronic diseases

**11. Do you think that SARS-CoV2 can be transmitted through contact with contaminated surfaces?**

- A. Yes
- B. No

**12. Do you know the correct way (five steps) of hand washing ?**

- A. Yes
- B. No

**13. Do you leave home during the home-stay period?**

- A. Yes
- B. No

**14. What is the main reason of leaving home**

- A. Purchasing necessary stuffs
- B. Buying a meal
- C. Meeting with friends
- D. Going to work or hospital
- E. Having fun and leisure time
- F. Not taking any restrictions, as there isn't any confirmed case in my area

**15. How many days you leaving home per week during the pandemic of COVID 19 ?**

- A. One day
- B. Two to three days
- C. Four to five days
- D. More than six days

**16. Approximately, how much of time per day are you spending outside your home during the pandemic of COVID 19 ?**

- A. Less than one hour
- B. Between one and two hours
- C. More than two hours

**17. Who joining you when you leaving home**

- A. No one
- B. Adult
- C. Child
- D. Whoever want to join

**18. Are you comply with “greeting by eyesight” and not shaking hands?**

- A. Yes, always
- B. Yes, sometimes
- C. Yes, more often
- D. No, as I believe it’s a disrespectful action to other
- E. No, as its not preferred by the community
- F. No, as I believe this action will not influence the spread of SARS-CoV2

**19. Do you wash hands or use alcohol gel when returning home?**

- A. I wash my hands with soap and water for 40 seconds
- B. I wash my hands with soap and water for less than 40 seconds
- C. I wash my hands with soap and use alcohol gel
- D. I use alcohol gel for 5 seconds
- E. I use alcohol gel for 20 seconds
- F. Neither wash my hands nor use gel
- G. Other

**20. How often do you follow the WHO recommendations on hand washing method?**

- A. Always
- B. Sometimes
- C. I started after reports of cases in Saudi Arabia
- D. I do not follow these recommendations

**21. When you leave home, do you wear gloves?**

- A. Yes, always
- B. Yes, sometimes
- C. No
- D. Other or I do not leave the home

**22. When you go to the supermarket, do you use facial masks provided by the supermarkets?**

- E. Yes, always
- F. Yes, sometimes
- G. No, because masks are not provided
- H. No, I do not want to use them
- I. Other or I do not leave the home

**23. Since the beginning of the COVID-19 pandemic, I changed:**

- A. Frequency and method of hand washing
- B. Frequency of hand washing
- C. Hand washing method
- D. Nothing changed
